# Supplementary material for: Clues of in vivo nuclear gene regulation by mitochondrial short non-coding RNAs
Source: Springer Nature journal article supplement (doi:10.1038/s41598-020-65084-z), 2020-05-19
Supplement: MOESM1 [file 41598_2020_65084_MOESM1_ESM.pdf]

## Clues of *in vivo* nuclear gene regulation by mitochondrial short non-coding RNAs

Marco Passamonti

Marco Calderone

Manuel Delpero

Federico Plazzi

Supplementary Dataset S1. Newly annotated smithRNAs in *Danio rerio*, *Drosophila melanogaster*, and *Mus musculus*. For naming conventions, see Methods.

Supplementary Dataset S2. Secondary structure of genomic context. The secondary structure of the genomic context of each smithRNA provided in Supplementary Dataset S1 online is shown in the dot-bracket (Vienna) format; the Gibbs free energy is provided within parentheses, after the secondary structure. See Methods for naming conventions.

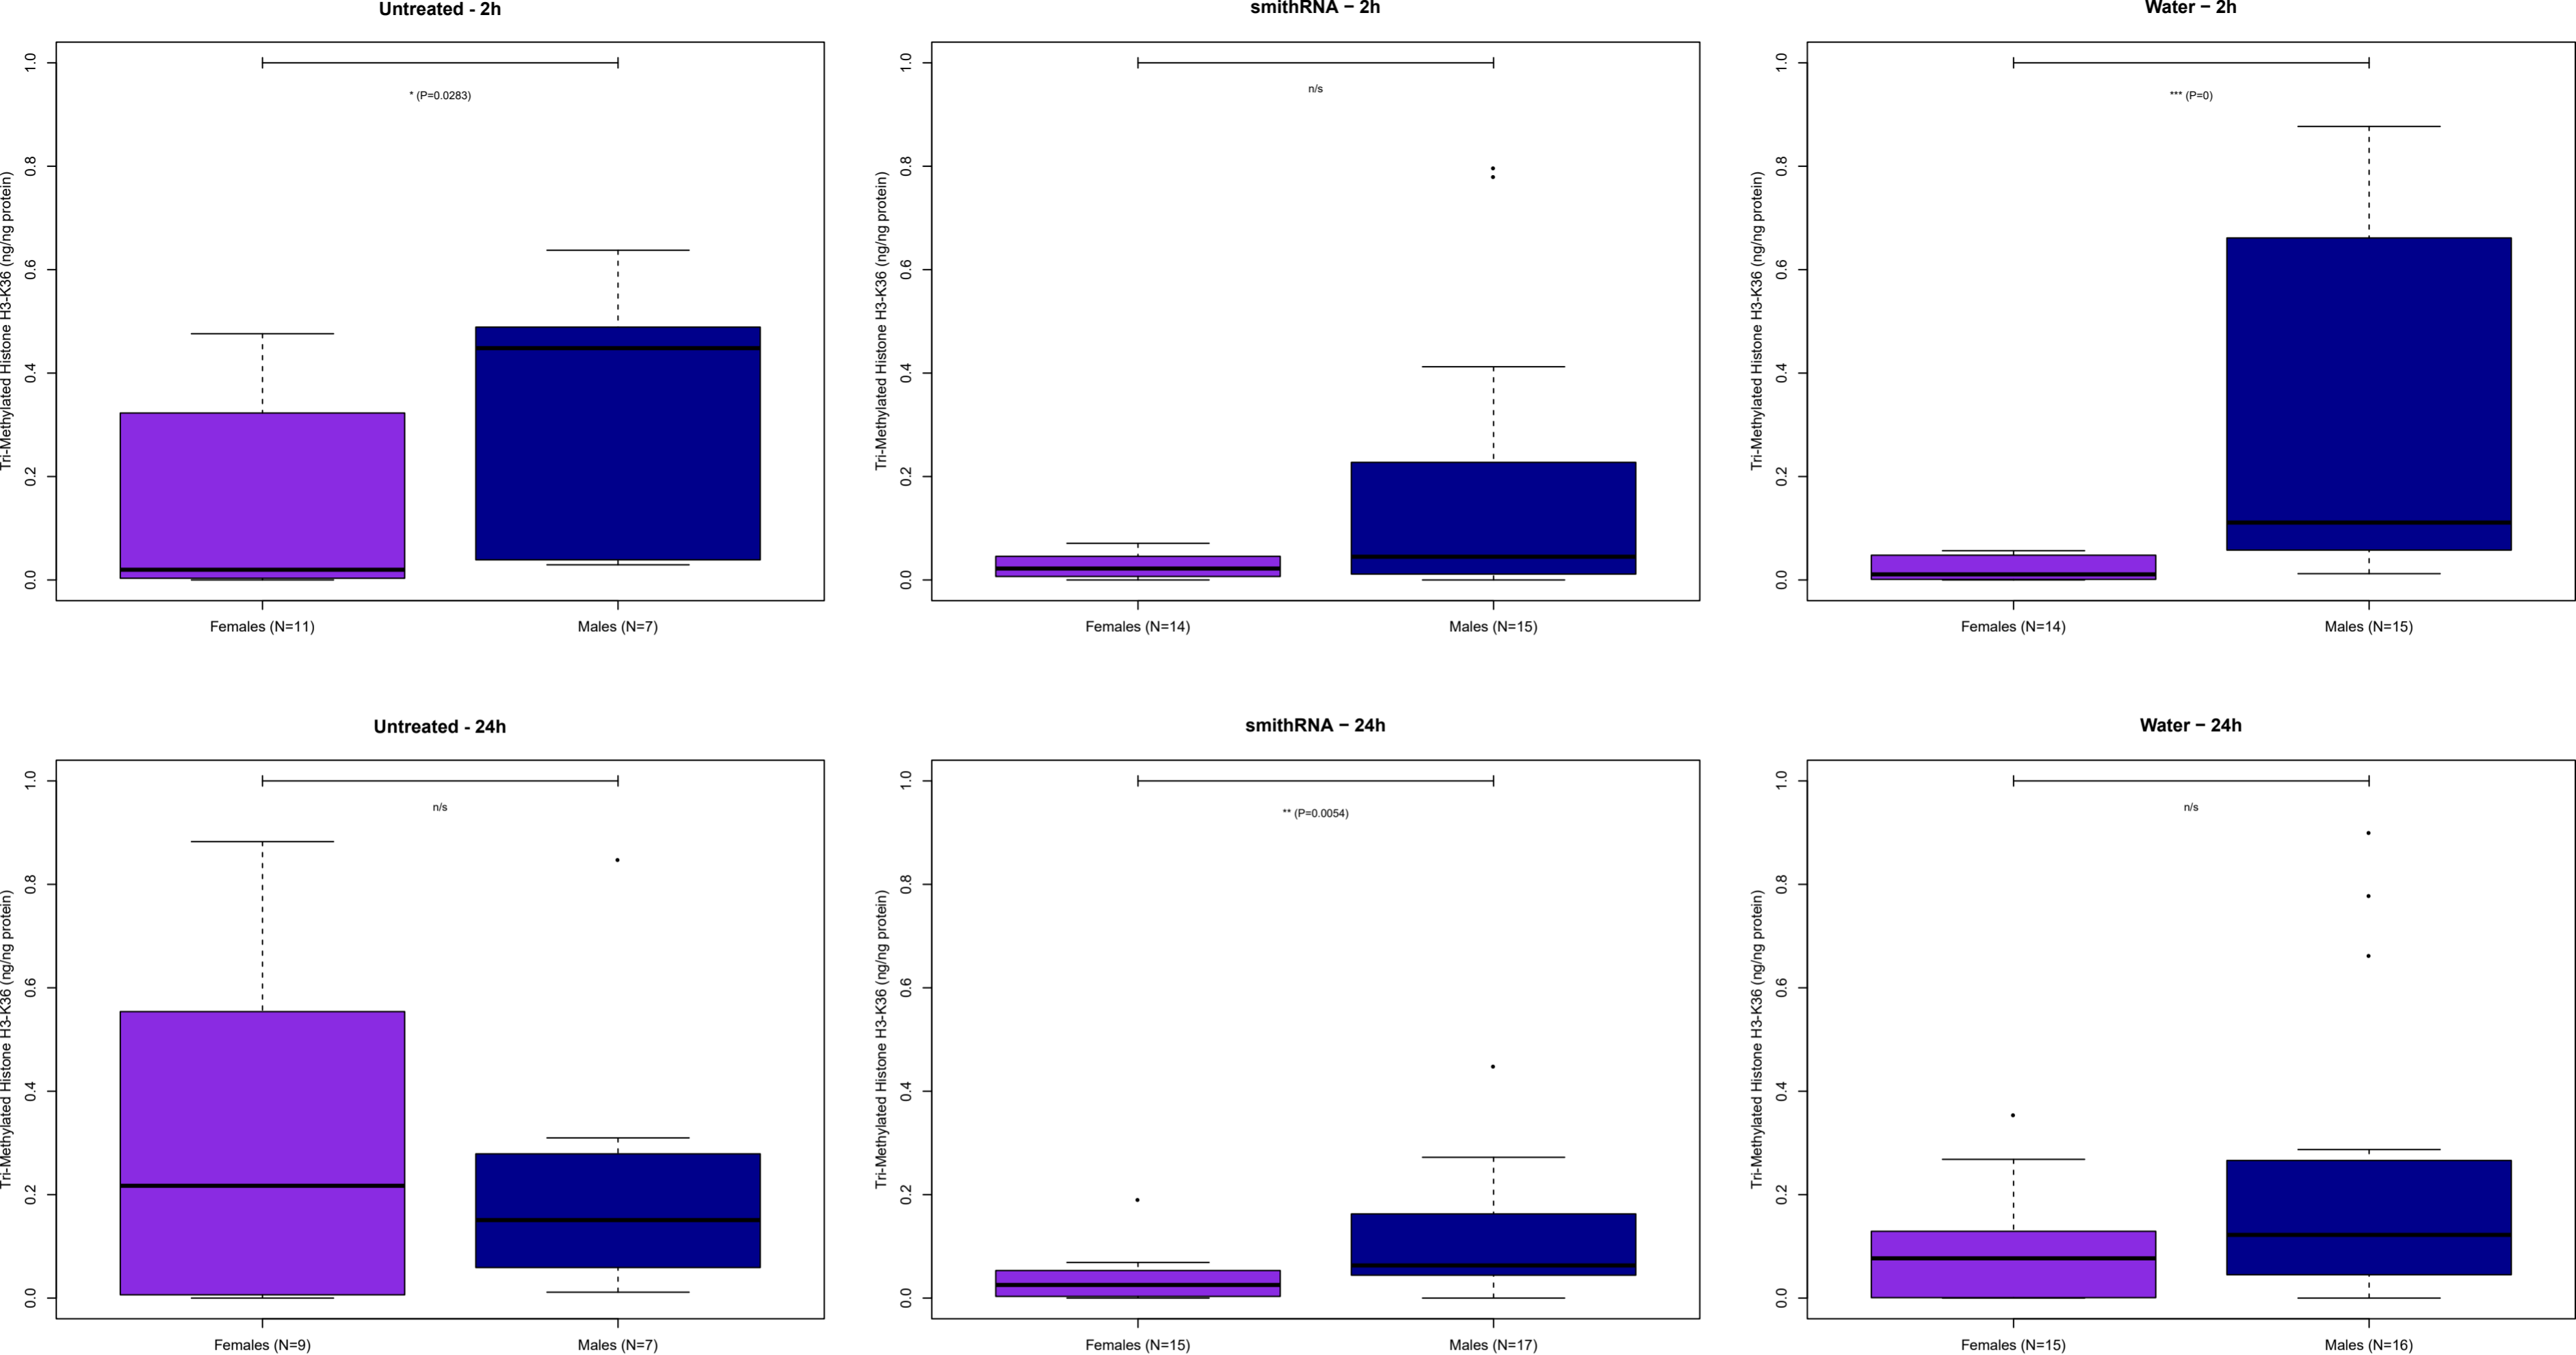

Supplementary Figure S1. Effect of the injection of M\_smithRNA106t on Manila clams subdivided by time after treatment and sex. Untreated, uninjected individuals; smithRNA, individuals injected with M\_smithRNA106t; water, individuals injected with ddH<sub>2</sub>O. The black line is the median; the two hinges of the box approximate the first and the third quartile; whiskers extend to a roughly 95% confidence interval.

***Drosophila melanogaster* - Nucleotide diversity**

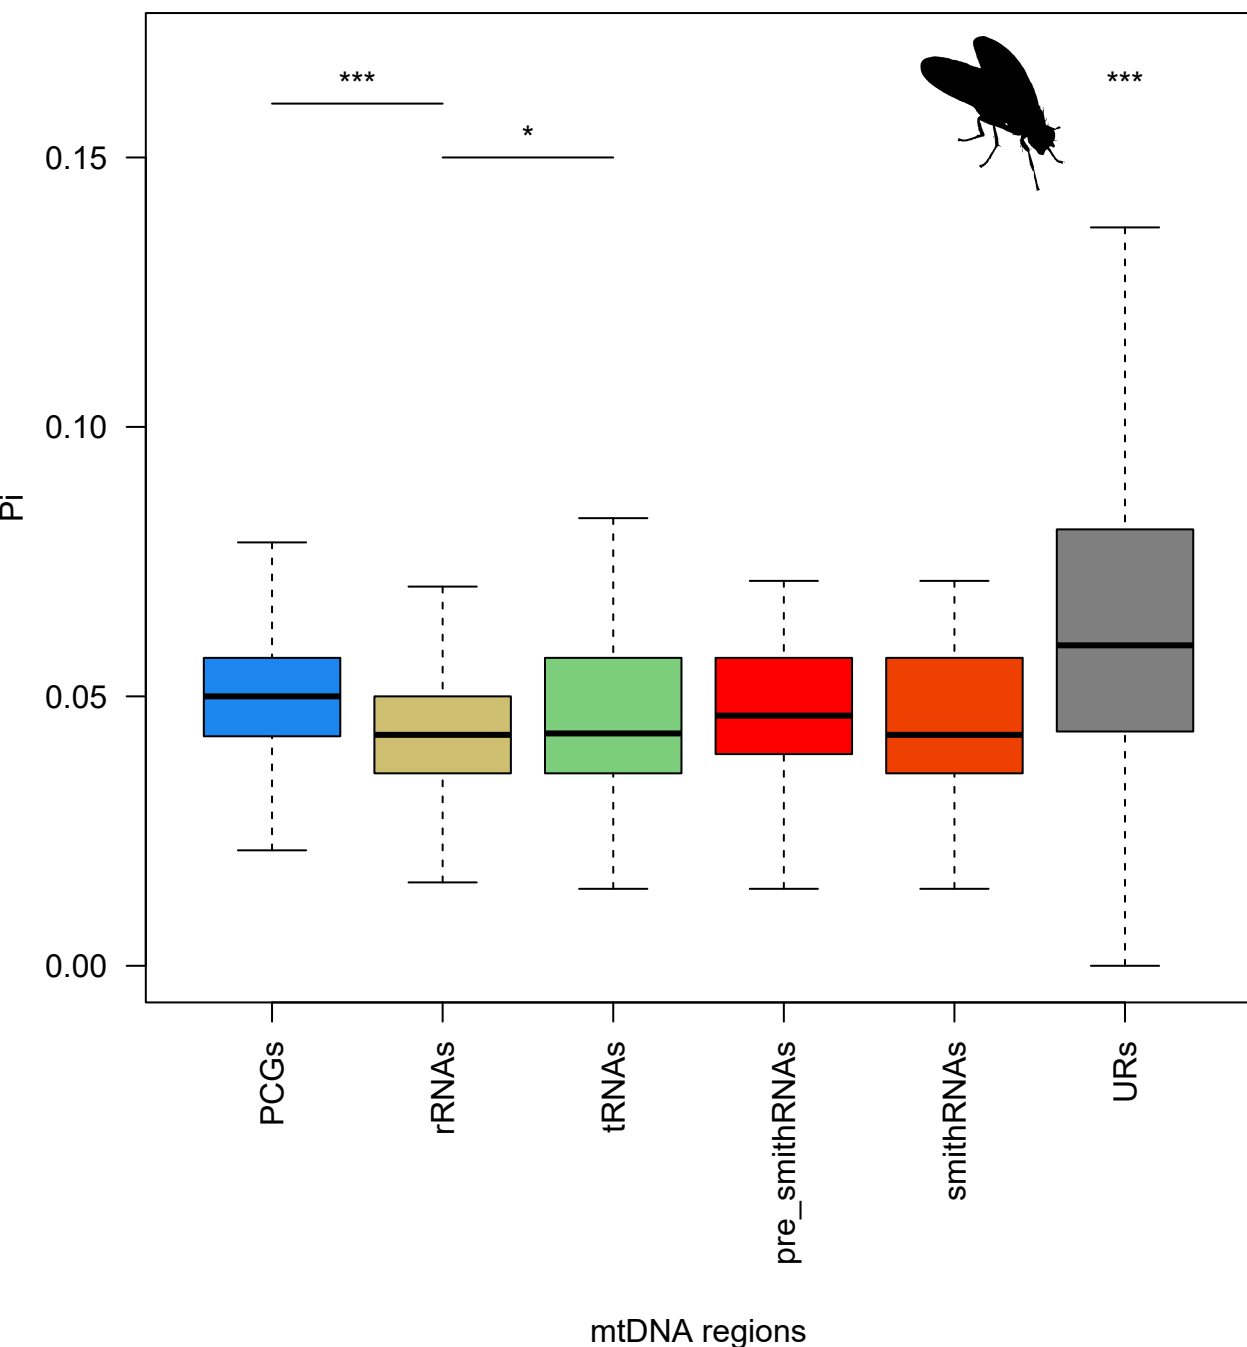

**b**

***Mus musculus* - Nucleotide diversity**

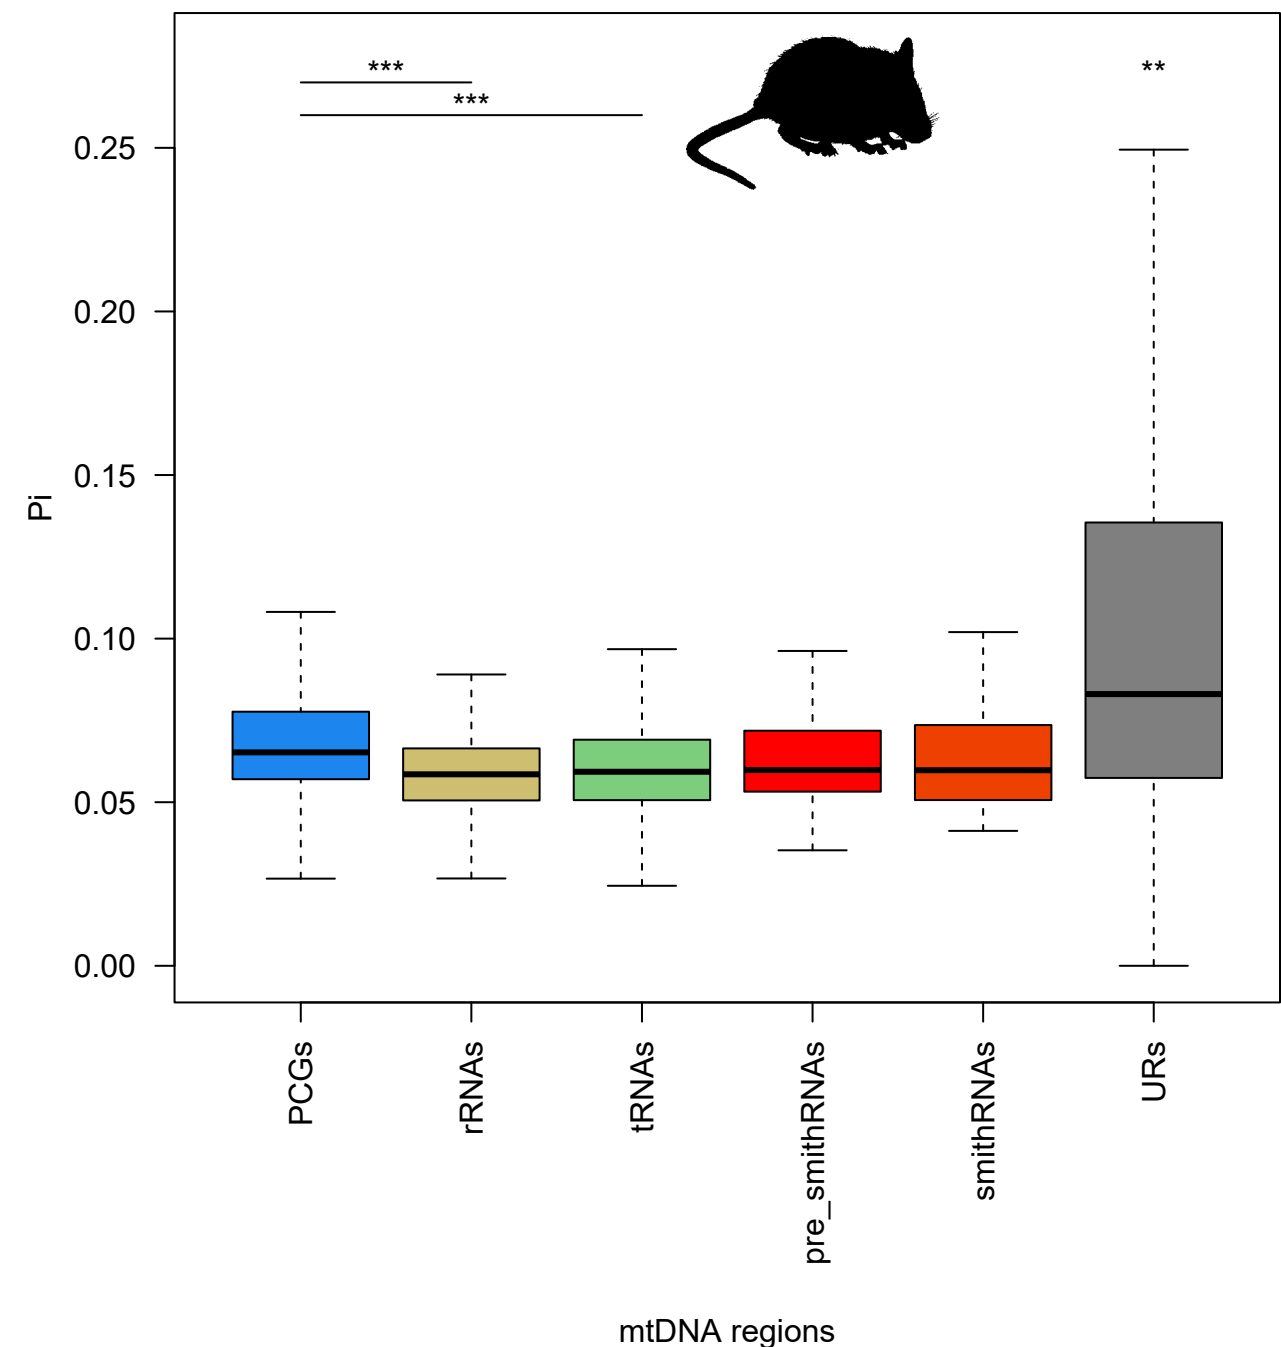

Supplementary Figure S2. Nucleotide diversity (Pi) computed along a sliding window over an alignment of (a) 43 *Drosophila melanogaster* and (b) 162 *Mus musculus* complete mitochondrial genomes. All significant two-tailed pairwise Dunn's test comparisons have an associated  $P < 0.0133$  for *Dr. melanogaster* and  $P < 0.0026$  for *M. musculus*. The black line is the median; the two hinges of the box approximate the first and the third quartile; whiskers extend to a roughly 95% confidence interval.

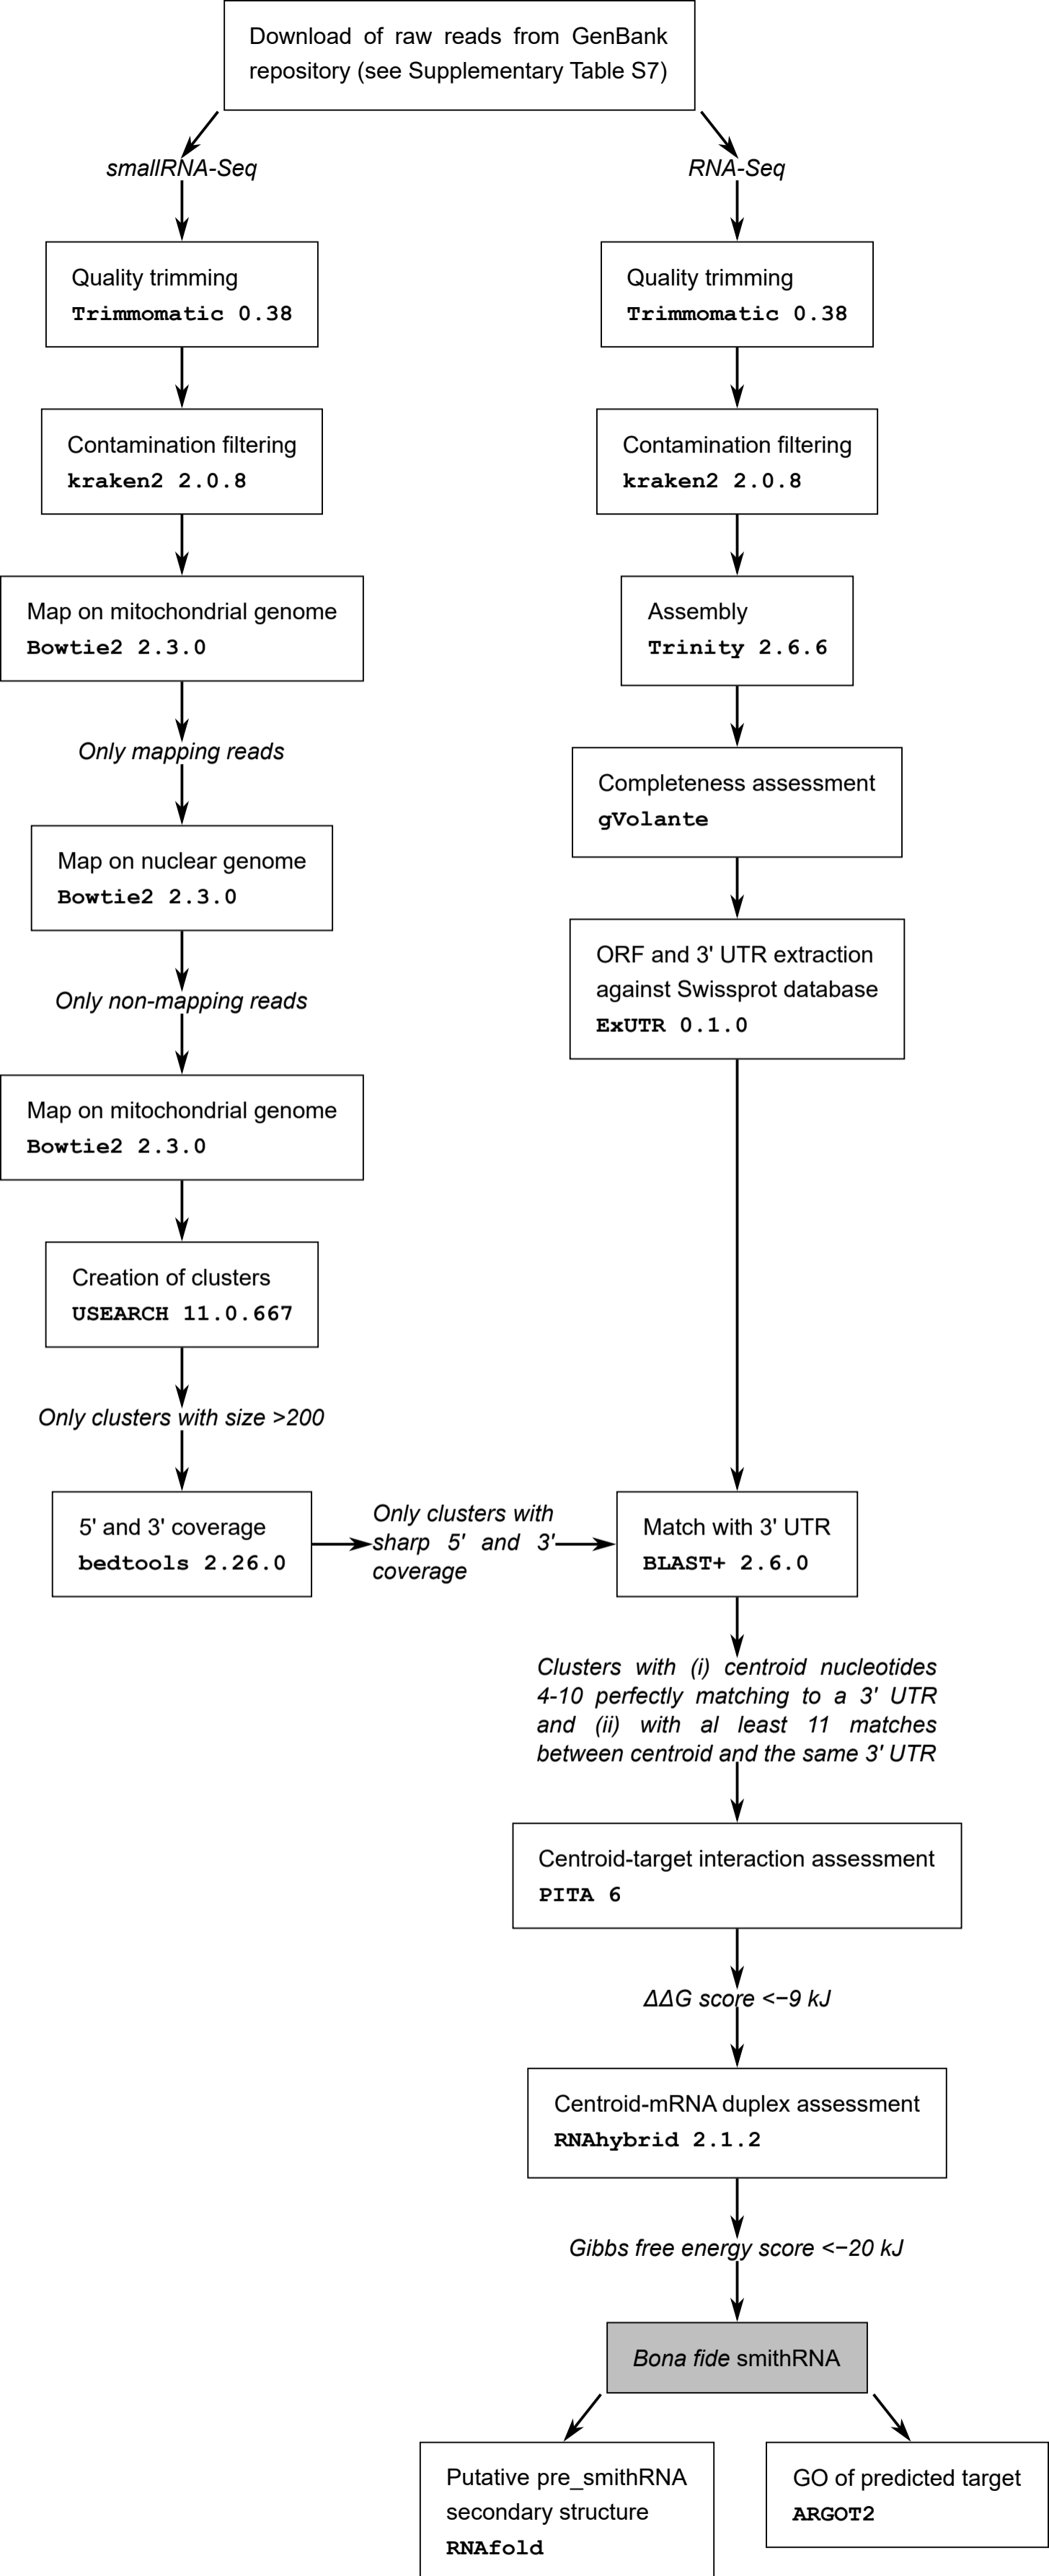

Supplementary Figure S3. The bioinformatic pipeline used for the detection of putative smithRNAs in model species.

Supplementary Table S1. Synonymous and nonsynonymous substitutions in PCGs flanking pre-smithRNA loci.

| Gene                    | Length of amplified region | Substitutions |               | Total |
|-------------------------|----------------------------|---------------|---------------|-------|
|                         |                            | synonymous    | nonsynonymous |       |
| F- <i>nad5</i> (N=15)   | 249 bp                     | 1             | 0             | 1     |
| F- <i>nad6</i> (N=15)   | 492 bp                     | 7             | 8             | 15    |
| F- <i>cox2-2</i> (N=13) | 132 bp                     | 0             | 1             | 1     |
| M- <i>cox1</i> (N=25)   | 229 bp                     | 6             | 1             | 7     |
| M- <i>nad1</i> (N=27)   | 281 bp                     | 6             | 1             | 7     |
| M- <i>nad5</i> (N=27)   | 286 bp                     | 12            | 17            | 29    |
| M- <i>nad6</i> (N=27)   | 492 bp                     | 11            | 4             | 15    |

Supplementary Table S2. Pairwise Dunn's test levels of significance for treatment with M\_smithRNA145t.

| Hours after treatment | Sex | Comparison <sup>1</sup>       | Dunn's test level of significance |
|-----------------------|-----|-------------------------------|-----------------------------------|
| 2                     | F   | Untreated–M_smithRNA145t      | 0.145                             |
|                       |     | Untreated–F_smithRNA107t      | 0.002                             |
|                       |     | M_smithRNA145t–F_smithRNA107t | 0.001***                          |
|                       | M   | Untreated–M_smithRNA145t      | 0.794                             |
|                       |     | Untreated–F_smithRNA107t      | 1.000                             |
|                       |     | M_smithRNA145t–F_smithRNA107t | 0.662                             |
| 24                    | F   | Untreated–M_smithRNA145t      | 1.000                             |
|                       |     | Untreated–F_smithRNA107t      | 0.852                             |
|                       |     | M_smithRNA145t–F_smithRNA107t | 0.576                             |
|                       | M   | Untreated–M_smithRNA145t      | 0.657                             |
|                       |     | Untreated–F_smithRNA107t      | 1.000                             |
|                       |     | M_smithRNA145t–F_smithRNA107t | 0.605                             |

<sup>1</sup> Untreated, individuals not injected; M\_smithRNA145t, individuals injected with 100 µg of M\_smithRNA145t (involved in histone acetylation regulation); F\_smithRNA107t, individuals injected with 100 µg of F\_smithRNA107t (not involved in histone acetylation regulation).



Supplementary Table S3. GO terms associated with predicted targets of newly annotated smithRNAs provided in Supplementary Dataset S1 online.

Supplementary Table S4. Hits of putative smithRNAs detected in *Danio rerio*, *Drosophila melanogaster*, and *Mus musculus*. Sequences were queried against miRbase (<http://www.mirbase.org/>), piRBase (<http://www.regulatoryrna.org/database/piRNA/index.html>), and fRNAdb ([http://togodb.biosciencedbc.jp/togodb/view/frnadb\\_summary#en](http://togodb.biosciencedbc.jp/togodb/view/frnadb_summary#en)). When a complete identity was found, the e-value is not provided.

| smithRNA            | Hit <sup>1</sup> | Organism                       | Locus <sup>2</sup>           | e-value | Database |
|---------------------|------------------|--------------------------------|------------------------------|---------|----------|
| DaRe_F_smithRNA32r  | bdi-miR162       | <i>Brachypodium distachyon</i> | 3: 49592002-49592134 [+]     | 1.6     | miRBase  |
| DaRe_F_smithRNA32r  | pab-miR162a      | <i>Picea abies</i>             | MA_230619: 2413-2531 [-]     | 1.6     | miRBase  |
| DaRe_M_smithRNA10t  | hsa-miR-1286     | <i>Homo sapiens</i>            | chr22: 20249134-20249211 [-] | 5.9     | miRBase  |
| DaRe_M_smithRNA10t  | ptr-miR-1286     | <i>Pan troglodytes</i>         | chr22: 6839054-6839130 [-]   | 5.9     | miRBase  |
| DaRe_M_smithRNA10t  | ppy-miR-1286     | <i>Pongo pygmaeus</i>          | chr22: 16146328-16146402 [-] | 5.9     | miRBase  |
| DaRe_M_smithRNA10t  | ggo-miR-1286     | <i>Gorilla gorilla</i>         | chr22: 3520215-3520325 [-]   | 5.9     | miRBase  |
| DaRe_M_smithRNA49t  | piR-mmu-3852     | <i>Mus musculus</i>            | chrM:3848-3879:+             | 0.098   | fRNAdb   |
| DrMe_F_smithRNA127r | FR508480         | <i>Drosophila</i>              |                              | 0.002   | fRNAdb   |
| DrMe_F_smithRNA127r | FR486950         | <i>Drosophila</i>              |                              | 0.002   | fRNAdb   |
| DrMe_F_smithRNA127r | FR476767         | <i>Drosophila</i>              |                              | 0.002   | fRNAdb   |
| DrMe_F_smithRNA127r | FR454233         | <i>Drosophila</i>              |                              | 0.002   | fRNAdb   |
| DrMe_F_smithRNA127r | FR430424         | <i>Drosophila</i>              |                              | 0.002   | fRNAdb   |
| DrMe_F_smithRNA127r | FR428652         | <i>Drosophila</i>              |                              | 0.002   | fRNAdb   |
| DrMe_F_smithRNA127r | FR426856         | <i>Drosophila</i>              |                              | 0.002   | fRNAdb   |
| DrMe_F_smithRNA127r | FR505462         | <i>Drosophila</i>              |                              | 0.006   | fRNAdb   |
| DrMe_F_smithRNA127r | FR505461         | <i>Drosophila</i>              |                              | 0.006   | fRNAdb   |
| DrMe_F_smithRNA127r | FR497675         | <i>Drosophila</i>              |                              | 0.006   | fRNAdb   |
| DrMe_F_smithRNA127r | FR476766         | <i>Drosophila</i>              |                              | 0.006   | fRNAdb   |
| DrMe_F_smithRNA127r | FR414623         | <i>Drosophila</i>              |                              | 0.006   | fRNAdb   |
| DrMe_F_smithRNA127r | FR497134         | <i>Drosophila</i>              |                              | 0.025   | fRNAdb   |
| DrMe_F_smithRNA134r | FR408244         | <i>Drosophila</i>              |                              | 4e-04   | fRNAdb   |
| DrMe_M_smithRNA128r | piR-dme-2563361  | <i>D. melanogaster</i>         | chrM:12877-12905:-           |         | piRBase  |
| DrMe_M_smithRNA128r | FR465521         | <i>Drosophila</i>              |                              | 7e-08   | fRNAdb   |
| DrMe_M_smithRNA128r | FR472905         | <i>Drosophila</i>              |                              | 4e-06   | fRNAdb   |
| DrMe_M_smithRNA128r | FR491761         | <i>Drosophila</i>              |                              | 2e-05   | fRNAdb   |
| DrMe_M_smithRNA128r | FR461400         | <i>Drosophila</i>              |                              | 2e-05   | fRNAdb   |
| DrMe_M_smithRNA128r | FR457376         | <i>Drosophila</i>              |                              | 2e-05   | fRNAdb   |
| DrMe_M_smithRNA128r | FR420437         | <i>Drosophila</i>              |                              | 2e-05   | fRNAdb   |
| DrMe_M_smithRNA128r | FR491760         | <i>Drosophila</i>              |                              | 7e-05   | fRNAdb   |
| DrMe_M_smithRNA128r | FR461399         | <i>Drosophila</i>              |                              | 7e-05   | fRNAdb   |
| DrMe_M_smithRNA128r | FR439103         | <i>Drosophila</i>              |                              | 7e-05   | fRNAdb   |
| DrMe_M_smithRNA128r | FR439102         | <i>Drosophila</i>              |                              | 7e-05   | fRNAdb   |
| DrMe_M_smithRNA128r | FR439101         | <i>Drosophila</i>              |                              | 7e-05   | fRNAdb   |

|                     |          |                   |       |        |
|---------------------|----------|-------------------|-------|--------|
| DrMe_M_smithRNA128r | FR507766 | <i>Drosophila</i> | 3e-04 | fRNAdb |
| DrMe_M_smithRNA128r | FR503730 | <i>Drosophila</i> | 3e-04 | fRNAdb |
| DrMe_M_smithRNA128r | FR491759 | <i>Drosophila</i> | 3e-04 | fRNAdb |
| DrMe_M_smithRNA128r | FR465520 | <i>Drosophila</i> | 3e-04 | fRNAdb |
| DrMe_M_smithRNA128r | FR462906 | <i>Drosophila</i> | 3e-04 | fRNAdb |
| DrMe_M_smithRNA128r | FR461398 | <i>Drosophila</i> | 3e-04 | fRNAdb |
| DrMe_M_smithRNA128r | FR444019 | <i>Drosophila</i> | 3e-04 | fRNAdb |
| DrMe_M_smithRNA128r | FR444018 | <i>Drosophila</i> | 3e-04 | fRNAdb |
| DrMe_M_smithRNA128r | FR444017 | <i>Drosophila</i> | 3e-04 | fRNAdb |
| DrMe_M_smithRNA128r | FR444016 | <i>Drosophila</i> | 3e-04 | fRNAdb |
| DrMe_M_smithRNA128r | FR439100 | <i>Drosophila</i> | 3e-04 | fRNAdb |
| DrMe_M_smithRNA128r | FR509191 | <i>Drosophila</i> | 0.001 | fRNAdb |
| DrMe_M_smithRNA128r | FR507765 | <i>Drosophila</i> | 0.001 | fRNAdb |
| DrMe_M_smithRNA128r | FR503729 | <i>Drosophila</i> | 0.001 | fRNAdb |
| DrMe_M_smithRNA128r | FR492723 | <i>Drosophila</i> | 0.001 | fRNAdb |
| DrMe_M_smithRNA128r | FR491758 | <i>Drosophila</i> | 0.001 | fRNAdb |
| DrMe_M_smithRNA128r | FR466072 | <i>Drosophila</i> | 0.001 | fRNAdb |
| DrMe_M_smithRNA128r | FR466071 | <i>Drosophila</i> | 0.001 | fRNAdb |
| DrMe_M_smithRNA128r | FR465519 | <i>Drosophila</i> | 0.001 | fRNAdb |
| DrMe_M_smithRNA128r | FR462905 | <i>Drosophila</i> | 0.001 | fRNAdb |
| DrMe_M_smithRNA128r | FR462003 | <i>Drosophila</i> | 0.001 | fRNAdb |
| DrMe_M_smithRNA128r | FR461397 | <i>Drosophila</i> | 0.001 | fRNAdb |
| DrMe_M_smithRNA128r | FR444015 | <i>Drosophila</i> | 0.001 | fRNAdb |
| DrMe_M_smithRNA128r | FR439099 | <i>Drosophila</i> | 0.001 | fRNAdb |
| DrMe_M_smithRNA128r | FR509190 | <i>Drosophila</i> | 0.004 | fRNAdb |
| DrMe_M_smithRNA128r | FR507764 | <i>Drosophila</i> | 0.004 | fRNAdb |
| DrMe_M_smithRNA128r | FR503728 | <i>Drosophila</i> | 0.004 | fRNAdb |
| DrMe_M_smithRNA128r | FR498186 | <i>Drosophila</i> | 0.004 | fRNAdb |
| DrMe_M_smithRNA128r | FR492722 | <i>Drosophila</i> | 0.004 | fRNAdb |
| DrMe_M_smithRNA128r | FR491757 | <i>Drosophila</i> | 0.004 | fRNAdb |
| DrMe_M_smithRNA128r | FR472904 | <i>Drosophila</i> | 0.004 | fRNAdb |
| DrMe_M_smithRNA128r | FR462904 | <i>Drosophila</i> | 0.004 | fRNAdb |
| DrMe_M_smithRNA128r | FR461396 | <i>Drosophila</i> | 0.004 | fRNAdb |
| DrMe_M_smithRNA128r | FR430554 | <i>Drosophila</i> | 0.004 | fRNAdb |
| DrMe_M_smithRNA128r | FR420436 | <i>Drosophila</i> | 0.004 | fRNAdb |
| DrMe_M_smithRNA128r | FR507763 | <i>Drosophila</i> | 0.016 | fRNAdb |
| DrMe_M_smithRNA128r | FR503727 | <i>Drosophila</i> | 0.016 | fRNAdb |
| DrMe_M_smithRNA128r | FR491756 | <i>Drosophila</i> | 0.016 | fRNAdb |
| DrMe_M_smithRNA128r | FR462903 | <i>Drosophila</i> | 0.016 | fRNAdb |
| DrMe_M_smithRNA128r | FR461395 | <i>Drosophila</i> | 0.016 | fRNAdb |
| DrMe_M_smithRNA128r | FR420435 | <i>Drosophila</i> | 0.016 | fRNAdb |
| DrMe_M_smithRNA128r | FR509189 | <i>Drosophila</i> | 0.065 | fRNAdb |

|                      |          |                   |       |        |
|----------------------|----------|-------------------|-------|--------|
| DrMe_M_smithRNA128r  | FR507762 | <i>Drosophila</i> | 0.065 | fRNAdb |
| DrMe_M_smithRNA128r  | FR503726 | <i>Drosophila</i> | 0.065 | fRNAdb |
| DrMe_M_smithRNA128r  | FR462002 | <i>Drosophila</i> | 0.065 | fRNAdb |
| DrMe_M_smithRNA128r  | FR461394 | <i>Drosophila</i> | 0.065 | fRNAdb |
| DrMe_M_smithRNA128r  | FR509188 | <i>Drosophila</i> | 0.26  | fRNAdb |
| DrMe_M_smithRNA128r  | FR507761 | <i>Drosophila</i> | 0.26  | fRNAdb |
| DrMe_M_smithRNA128r  | FR503725 | <i>Drosophila</i> | 0.26  | fRNAdb |
| DrMe_M_smithRNA128r  | FR491755 | <i>Drosophila</i> | 0.26  | fRNAdb |
| DrMe_M_smithRNA128r  | FR461393 | <i>Drosophila</i> | 0.26  | fRNAdb |
| DrMe_M_smithRNA128r  | FR430553 | <i>Drosophila</i> | 0.26  | fRNAdb |
| DrMe_M_smithRNA129rA | FR502574 | <i>Drosophila</i> | 0.002 | fRNAdb |
| DrMe_M_smithRNA129rA | FR488828 | <i>Drosophila</i> | 0.002 | fRNAdb |
| DrMe_M_smithRNA129rA | FR488827 | <i>Drosophila</i> | 0.002 | fRNAdb |
| DrMe_M_smithRNA129rA | FR481546 | <i>Drosophila</i> | 0.002 | fRNAdb |
| DrMe_M_smithRNA129rA | FR481545 | <i>Drosophila</i> | 0.002 | fRNAdb |
| DrMe_M_smithRNA129rA | FR481544 | <i>Drosophila</i> | 0.002 | fRNAdb |
| DrMe_M_smithRNA129rA | FR457625 | <i>Drosophila</i> | 0.002 | fRNAdb |
| DrMe_M_smithRNA129rA | FR452260 | <i>Drosophila</i> | 0.002 | fRNAdb |
| DrMe_M_smithRNA129rA | FR452259 | <i>Drosophila</i> | 0.002 | fRNAdb |
| DrMe_M_smithRNA129rA | FR446084 | <i>Drosophila</i> | 0.002 | fRNAdb |
| DrMe_M_smithRNA129rA | FR439370 | <i>Drosophila</i> | 0.002 | fRNAdb |
| DrMe_M_smithRNA129rA | FR439369 | <i>Drosophila</i> | 0.002 | fRNAdb |
| DrMe_M_smithRNA129rA | FR416755 | <i>Drosophila</i> | 0.002 | fRNAdb |
| DrMe_M_smithRNA129rA | FR502573 | <i>Drosophila</i> | 0.006 | fRNAdb |
| DrMe_M_smithRNA129rA | FR457624 | <i>Drosophila</i> | 0.006 | fRNAdb |
| DrMe_M_smithRNA129rA | FR441277 | <i>Drosophila</i> | 0.006 | fRNAdb |
| DrMe_M_smithRNA129rA | FR441276 | <i>Drosophila</i> | 0.006 | fRNAdb |
| DrMe_M_smithRNA129rA | FR441275 | <i>Drosophila</i> | 0.006 | fRNAdb |
| DrMe_M_smithRNA129rA | FR441274 | <i>Drosophila</i> | 0.006 | fRNAdb |
| DrMe_M_smithRNA129rA | FR502572 | <i>Drosophila</i> | 0.025 | fRNAdb |
| DrMe_M_smithRNA129rA | FR488826 | <i>Drosophila</i> | 0.025 | fRNAdb |
| DrMe_M_smithRNA129rA | FR457623 | <i>Drosophila</i> | 0.025 | fRNAdb |
| DrMe_M_smithRNA129rA | FR455331 | <i>Drosophila</i> | 0.025 | fRNAdb |
| DrMe_M_smithRNA129rA | FR455069 | <i>Drosophila</i> | 0.025 | fRNAdb |
| DrMe_M_smithRNA129rA | FR440428 | <i>Drosophila</i> | 0.025 | fRNAdb |
| DrMe_M_smithRNA129rA | FR439368 | <i>Drosophila</i> | 0.025 | fRNAdb |
| DrMe_M_smithRNA129rA | FR416754 | <i>Drosophila</i> | 0.025 | fRNAdb |
| DrMe_M_smithRNA129rA | FR488825 | <i>Drosophila</i> | 0.099 | fRNAdb |
| DrMe_M_smithRNA129rA | FR457622 | <i>Drosophila</i> | 0.099 | fRNAdb |
| DrMe_M_smithRNA129rA | FR452258 | <i>Drosophila</i> | 0.099 | fRNAdb |
| DrMe_M_smithRNA129rA | FR439367 | <i>Drosophila</i> | 0.099 | fRNAdb |
| DrMe_M_smithRNA129rA | FR429489 | <i>Drosophila</i> | 0.099 | fRNAdb |

|                      |                |                        |                    |       |         |
|----------------------|----------------|------------------------|--------------------|-------|---------|
| DrMe_M_smithRNA129rA | FR428291       | <i>Drosophila</i>      |                    | 0.099 | fRNAdb  |
| DrMe_M_smithRNA129rB | piR-dme-108224 | <i>D. melanogaster</i> | chrM:12922-12945:- |       | piRBase |
| DrMe_M_smithRNA129rB | FR411819       | <i>Drosophila</i>      |                    | 1e-05 | fRNAdb  |
| DrMe_M_smithRNA129rB | FR411818       | <i>Drosophila</i>      |                    | 1e-05 | fRNAdb  |
| DrMe_M_smithRNA129rB | FR411817       | <i>Drosophila</i>      |                    | 1e-05 | fRNAdb  |
| DrMe_M_smithRNA129rB | FR411816       | <i>Drosophila</i>      |                    | 1e-05 | fRNAdb  |
| DrMe_M_smithRNA129rB | FR411815       | <i>Drosophila</i>      |                    | 1e-05 | fRNAdb  |
| DrMe_M_smithRNA129rB | FR409014       | <i>Drosophila</i>      |                    | 1e-05 | fRNAdb  |
| DrMe_M_smithRNA129rB | FR409013       | <i>Drosophila</i>      |                    | 1e-05 | fRNAdb  |
| DrMe_M_smithRNA129rB | FR409012       | <i>Drosophila</i>      |                    | 1e-05 | fRNAdb  |
| DrMe_M_smithRNA129rB | FR408118       | <i>Drosophila</i>      |                    | 1e-05 | fRNAdb  |
| DrMe_M_smithRNA129rB | FR408117       | <i>Drosophila</i>      |                    | 1e-05 | fRNAdb  |
| DrMe_M_smithRNA129rB | FR408116       | <i>Drosophila</i>      |                    | 1e-05 | fRNAdb  |
| DrMe_M_smithRNA129rB | FR407864       | <i>Drosophila</i>      |                    | 1e-05 | fRNAdb  |
| DrMe_M_smithRNA129rB | FR407863       | <i>Drosophila</i>      |                    | 1e-05 | fRNAdb  |
| DrMe_M_smithRNA129rB | FR407862       | <i>Drosophila</i>      |                    | 1e-05 | fRNAdb  |
| DrMe_M_smithRNA129rB | FR407776       | <i>Drosophila</i>      |                    | 1e-05 | fRNAdb  |
| DrMe_M_smithRNA129rB | FR423494       | <i>Drosophila</i>      |                    | 4e-05 | fRNAdb  |
| DrMe_M_smithRNA129rB | FR419887       | <i>Drosophila</i>      |                    | 4e-05 | fRNAdb  |
| DrMe_M_smithRNA129rB | FR419886       | <i>Drosophila</i>      |                    | 4e-05 | fRNAdb  |
| DrMe_M_smithRNA129rB | FR419885       | <i>Drosophila</i>      |                    | 4e-05 | fRNAdb  |
| DrMe_M_smithRNA129rB | FR419884       | <i>Drosophila</i>      |                    | 4e-05 | fRNAdb  |
| DrMe_M_smithRNA129rB | FR419883       | <i>Drosophila</i>      |                    | 4e-05 | fRNAdb  |
| DrMe_M_smithRNA129rB | FR411814       | <i>Drosophila</i>      |                    | 4e-05 | fRNAdb  |
| DrMe_M_smithRNA129rB | FR409011       | <i>Drosophila</i>      |                    | 4e-05 | fRNAdb  |
| DrMe_M_smithRNA129rB | FR408115       | <i>Drosophila</i>      |                    | 4e-05 | fRNAdb  |
| DrMe_M_smithRNA129rB | FR407775       | <i>Drosophila</i>      |                    | 4e-05 | fRNAdb  |
| DrMe_M_smithRNA129rB | FR455331       | <i>Drosophila</i>      |                    | 2e-04 | fRNAdb  |
| DrMe_M_smithRNA129rB | FR455330       | <i>Drosophila</i>      |                    | 2e-04 | fRNAdb  |
| DrMe_M_smithRNA129rB | FR455329       | <i>Drosophila</i>      |                    | 2e-04 | fRNAdb  |
| DrMe_M_smithRNA129rB | FR455328       | <i>Drosophila</i>      |                    | 2e-04 | fRNAdb  |
| DrMe_M_smithRNA129rB | FR455327       | <i>Drosophila</i>      |                    | 2e-04 | fRNAdb  |
| DrMe_M_smithRNA129rB | FR455326       | <i>Drosophila</i>      |                    | 2e-04 | fRNAdb  |
| DrMe_M_smithRNA129rB | FR423493       | <i>Drosophila</i>      |                    | 2e-04 | fRNAdb  |
| DrMe_M_smithRNA129rB | FR419882       | <i>Drosophila</i>      |                    | 2e-04 | fRNAdb  |
| DrMe_M_smithRNA129rB | FR411813       | <i>Drosophila</i>      |                    | 2e-04 | fRNAdb  |
| DrMe_M_smithRNA129rB | FR409010       | <i>Drosophila</i>      |                    | 2e-04 | fRNAdb  |
| DrMe_M_smithRNA129rB | FR408114       | <i>Drosophila</i>      |                    | 2e-04 | fRNAdb  |
| DrMe_M_smithRNA129rB | FR455325       | <i>Drosophila</i>      |                    | 6e-04 | fRNAdb  |
| DrMe_M_smithRNA129rB | FR429489       | <i>Drosophila</i>      |                    | 6e-04 | fRNAdb  |
| DrMe_M_smithRNA129rB | FR429488       | <i>Drosophila</i>      |                    | 6e-04 | fRNAdb  |
| DrMe_M_smithRNA129rB | FR429487       | <i>Drosophila</i>      |                    | 6e-04 | fRNAdb  |

|                      |          |                   |       |        |
|----------------------|----------|-------------------|-------|--------|
| DrMe_M_smithRNA129rB | FR429486 | <i>Drosophila</i> | 6e-04 | fRNAdb |
| DrMe_M_smithRNA129rB | FR429485 | <i>Drosophila</i> | 6e-04 | fRNAdb |
| DrMe_M_smithRNA129rB | FR429484 | <i>Drosophila</i> | 6e-04 | fRNAdb |
| DrMe_M_smithRNA129rB | FR419881 | <i>Drosophila</i> | 6e-04 | fRNAdb |
| DrMe_M_smithRNA129rB | FR411812 | <i>Drosophila</i> | 6e-04 | fRNAdb |
| DrMe_M_smithRNA129rB | FR409009 | <i>Drosophila</i> | 6e-04 | fRNAdb |
| DrMe_M_smithRNA129rB | FR408113 | <i>Drosophila</i> | 6e-04 | fRNAdb |
| DrMe_M_smithRNA129rB | FR502574 | <i>Drosophila</i> | 0.003 | fRNAdb |
| DrMe_M_smithRNA129rB | FR502573 | <i>Drosophila</i> | 0.003 | fRNAdb |
| DrMe_M_smithRNA129rB | FR502572 | <i>Drosophila</i> | 0.003 | fRNAdb |
| DrMe_M_smithRNA129rB | FR502571 | <i>Drosophila</i> | 0.003 | fRNAdb |
| DrMe_M_smithRNA129rB | FR502570 | <i>Drosophila</i> | 0.003 | fRNAdb |
| DrMe_M_smithRNA129rB | FR502569 | <i>Drosophila</i> | 0.003 | fRNAdb |
| DrMe_M_smithRNA129rB | FR502568 | <i>Drosophila</i> | 0.003 | fRNAdb |
| DrMe_M_smithRNA129rB | FR502567 | <i>Drosophila</i> | 0.003 | fRNAdb |
| DrMe_M_smithRNA129rB | FR455324 | <i>Drosophila</i> | 0.003 | fRNAdb |
| DrMe_M_smithRNA129rB | FR453907 | <i>Drosophila</i> | 0.003 | fRNAdb |
| DrMe_M_smithRNA129rB | FR429483 | <i>Drosophila</i> | 0.003 | fRNAdb |
| DrMe_M_smithRNA129rB | FR419880 | <i>Drosophila</i> | 0.003 | fRNAdb |
| DrMe_M_smithRNA129rB | FR411811 | <i>Drosophila</i> | 0.003 | fRNAdb |
| DrMe_M_smithRNA129rB | FR409008 | <i>Drosophila</i> | 0.003 | fRNAdb |
| DrMe_M_smithRNA129rB | FR408112 | <i>Drosophila</i> | 0.003 | fRNAdb |
| DrMe_M_smithRNA129rB | FR407861 | <i>Drosophila</i> | 0.003 | fRNAdb |
| DrMe_M_smithRNA129rB | FR407774 | <i>Drosophila</i> | 0.003 | fRNAdb |
| DrMe_M_smithRNA129rB | FR502566 | <i>Drosophila</i> | 0.010 | fRNAdb |
| DrMe_M_smithRNA129rB | FR488828 | <i>Drosophila</i> | 0.010 | fRNAdb |
| DrMe_M_smithRNA129rB | FR488827 | <i>Drosophila</i> | 0.010 | fRNAdb |
| DrMe_M_smithRNA129rB | FR488826 | <i>Drosophila</i> | 0.010 | fRNAdb |
| DrMe_M_smithRNA129rB | FR488825 | <i>Drosophila</i> | 0.010 | fRNAdb |
| DrMe_M_smithRNA129rB | FR488824 | <i>Drosophila</i> | 0.010 | fRNAdb |
| DrMe_M_smithRNA129rB | FR488823 | <i>Drosophila</i> | 0.010 | fRNAdb |
| DrMe_M_smithRNA129rB | FR488822 | <i>Drosophila</i> | 0.010 | fRNAdb |
| DrMe_M_smithRNA129rB | FR488821 | <i>Drosophila</i> | 0.010 | fRNAdb |
| DrMe_M_smithRNA129rB | FR488820 | <i>Drosophila</i> | 0.010 | fRNAdb |
| DrMe_M_smithRNA129rB | FR455323 | <i>Drosophila</i> | 0.010 | fRNAdb |
| DrMe_M_smithRNA129rB | FR429482 | <i>Drosophila</i> | 0.010 | fRNAdb |
| DrMe_M_smithRNA129rB | FR419879 | <i>Drosophila</i> | 0.010 | fRNAdb |
| DrMe_M_smithRNA129rB | FR411810 | <i>Drosophila</i> | 0.010 | fRNAdb |
| DrMe_M_smithRNA129rB | FR409007 | <i>Drosophila</i> | 0.010 | fRNAdb |
| DrMe_M_smithRNA129rB | FR408111 | <i>Drosophila</i> | 0.010 | fRNAdb |
| DrMe_M_smithRNA129rB | FR407860 | <i>Drosophila</i> | 0.010 | fRNAdb |
| DrMe_M_smithRNA129rB | FR502565 | <i>Drosophila</i> | 0.040 | fRNAdb |

|                      |              |                   |                  |       |        |
|----------------------|--------------|-------------------|------------------|-------|--------|
| DrMe_M_smithRNA129rB | FR457625     | <i>Drosophila</i> |                  | 0.040 | fRNAdb |
| DrMe_M_smithRNA129rB | FR457624     | <i>Drosophila</i> |                  | 0.040 | fRNAdb |
| DrMe_M_smithRNA129rB | FR457623     | <i>Drosophila</i> |                  | 0.040 | fRNAdb |
| DrMe_M_smithRNA129rB | FR457622     | <i>Drosophila</i> |                  | 0.040 | fRNAdb |
| DrMe_M_smithRNA129rB | FR457621     | <i>Drosophila</i> |                  | 0.040 | fRNAdb |
| DrMe_M_smithRNA129rB | FR457620     | <i>Drosophila</i> |                  | 0.040 | fRNAdb |
| DrMe_M_smithRNA129rB | FR457619     | <i>Drosophila</i> |                  | 0.040 | fRNAdb |
| DrMe_M_smithRNA129rB | FR457618     | <i>Drosophila</i> |                  | 0.040 | fRNAdb |
| DrMe_M_smithRNA129rB | FR453906     | <i>Drosophila</i> |                  | 0.040 | fRNAdb |
| DrMe_M_smithRNA129rB | FR441001     | <i>Drosophila</i> |                  | 0.040 | fRNAdb |
| DrMe_M_smithRNA129rB | FR425908     | <i>Drosophila</i> |                  | 0.040 | fRNAdb |
| DrMe_M_smithRNA129rB | FR419878     | <i>Drosophila</i> |                  | 0.040 | fRNAdb |
| DrMe_M_smithRNA129rB | FR409006     | <i>Drosophila</i> |                  | 0.040 | fRNAdb |
| DrMe_M_smithRNA129rB | FR407859     | <i>Drosophila</i> |                  | 0.040 | fRNAdb |
| DrMe_M_smithRNA129rB | FR440428     | <i>Drosophila</i> |                  | 0.16  | fRNAdb |
| DrMe_M_smithRNA129rB | FR440427     | <i>Drosophila</i> |                  | 0.16  | fRNAdb |
| DrMe_M_smithRNA129rB | FR440426     | <i>Drosophila</i> |                  | 0.16  | fRNAdb |
| DrMe_M_smithRNA129rB | FR440425     | <i>Drosophila</i> |                  | 0.16  | fRNAdb |
| DrMe_M_smithRNA129rB | FR408110     | <i>Drosophila</i> |                  | 0.16  | fRNAdb |
| DrMe_M_smithRNA129rB | FR407858     | <i>Drosophila</i> |                  | 0.16  | fRNAdb |
| DrMe_M_smithRNA129rB | piR-hsa-1847 | <i>Human</i>      | chrM:2971-2999:+ | 0.16  | fRNAdb |
| DrMe_M_smithRNA129rB | piR-hsa-2155 | <i>Human</i>      | chrM:2966-2997:+ | 0.16  | fRNAdb |
| DrMe_M_smithRNA132r  | FR490193     | <i>Drosophila</i> |                  | 0.005 | fRNAdb |
| DrMe_M_smithRNA132r  | FR490192     | <i>Drosophila</i> |                  | 0.005 | fRNAdb |
| DrMe_M_smithRNA132r  | FR490191     | <i>Drosophila</i> |                  | 0.005 | fRNAdb |
| DrMe_M_smithRNA132r  | FR490190     | <i>Drosophila</i> |                  | 0.005 | fRNAdb |
| DrMe_M_smithRNA132r  | FR460825     | <i>Drosophila</i> |                  | 0.005 | fRNAdb |
| DrMe_M_smithRNA132r  | FR460824     | <i>Drosophila</i> |                  | 0.005 | fRNAdb |
| DrMe_M_smithRNA132r  | FR460823     | <i>Drosophila</i> |                  | 0.005 | fRNAdb |
| DrMe_M_smithRNA132r  | FR460822     | <i>Drosophila</i> |                  | 0.005 | fRNAdb |
| DrMe_M_smithRNA132r  | FR460821     | <i>Drosophila</i> |                  | 0.005 | fRNAdb |
| DrMe_M_smithRNA132r  | FR459462     | <i>Drosophila</i> |                  | 0.005 | fRNAdb |
| DrMe_M_smithRNA132r  | FR459461     | <i>Drosophila</i> |                  | 0.005 | fRNAdb |
| DrMe_M_smithRNA132r  | FR459460     | <i>Drosophila</i> |                  | 0.005 | fRNAdb |
| DrMe_M_smithRNA132r  | FR459459     | <i>Drosophila</i> |                  | 0.005 | fRNAdb |
| DrMe_M_smithRNA132r  | FR459458     | <i>Drosophila</i> |                  | 0.005 | fRNAdb |
| DrMe_M_smithRNA132r  | FR459457     | <i>Drosophila</i> |                  | 0.005 | fRNAdb |
| DrMe_M_smithRNA132r  | FR459456     | <i>Drosophila</i> |                  | 0.005 | fRNAdb |
| DrMe_M_smithRNA132r  | FR459455     | <i>Drosophila</i> |                  | 0.005 | fRNAdb |
| DrMe_M_smithRNA132r  | FR458886     | <i>Drosophila</i> |                  | 0.005 | fRNAdb |
| DrMe_M_smithRNA132r  | FR458885     | <i>Drosophila</i> |                  | 0.005 | fRNAdb |
| DrMe_M_smithRNA132r  | FR458884     | <i>Drosophila</i> |                  | 0.005 | fRNAdb |

|                      |          |                   |       |        |
|----------------------|----------|-------------------|-------|--------|
| DrMe_M_smithRNA132r  | FR458883 | <i>Drosophila</i> | 0.005 | fRNAdb |
| DrMe_M_smithRNA132r  | FR458882 | <i>Drosophila</i> | 0.005 | fRNAdb |
| DrMe_M_smithRNA132r  | FR451370 | <i>Drosophila</i> | 0.005 | fRNAdb |
| DrMe_M_smithRNA132r  | FR451369 | <i>Drosophila</i> | 0.005 | fRNAdb |
| DrMe_M_smithRNA132r  | FR447729 | <i>Drosophila</i> | 0.005 | fRNAdb |
| DrMe_M_smithRNA132r  | FR447728 | <i>Drosophila</i> | 0.005 | fRNAdb |
| DrMe_M_smithRNA132r  | FR447727 | <i>Drosophila</i> | 0.005 | fRNAdb |
| DrMe_M_smithRNA132r  | FR421706 | <i>Drosophila</i> | 0.005 | fRNAdb |
| DrMe_M_smithRNA132r  | FR421705 | <i>Drosophila</i> | 0.005 | fRNAdb |
| DrMe_M_smithRNA132r  | FR421704 | <i>Drosophila</i> | 0.005 | fRNAdb |
| DrMe_M_smithRNA132r  | FR421703 | <i>Drosophila</i> | 0.005 | fRNAdb |
| DrMe_M_smithRNA132r  | FR412445 | <i>Drosophila</i> | 0.005 | fRNAdb |
| DrMe_M_smithRNA132r  | FR412444 | <i>Drosophila</i> | 0.005 | fRNAdb |
| DrMe_M_smithRNA132r  | FR412443 | <i>Drosophila</i> | 0.005 | fRNAdb |
| DrMe_M_smithRNA132r  | FR501375 | <i>Drosophila</i> | 0.020 | fRNAdb |
| DrMe_M_smithRNA132r  | FR460820 | <i>Drosophila</i> | 0.020 | fRNAdb |
| DrMe_M_smithRNA132r  | FR451662 | <i>Drosophila</i> | 0.020 | fRNAdb |
| DrMe_M_smithRNA132r  | FR451661 | <i>Drosophila</i> | 0.020 | fRNAdb |
| DrMe_M_smithRNA132r  | FR421702 | <i>Drosophila</i> | 0.020 | fRNAdb |
| DrMe_M_smithRNA132r  | FR460819 | <i>Drosophila</i> | 0.079 | fRNAdb |
| DrMe_M_smithRNA132r  | FR458881 | <i>Drosophila</i> | 0.079 | fRNAdb |
| DrMe_M_smithRNA132r  | FR451368 | <i>Drosophila</i> | 0.079 | fRNAdb |
| DrMe_M_smithRNA132r  | FR447726 | <i>Drosophila</i> | 0.079 | fRNAdb |
| DrMe_M_smithRNA132r  | FR421701 | <i>Drosophila</i> | 0.079 | fRNAdb |
| DrMe_M_smithRNA132r  | FR414770 | <i>Drosophila</i> | 0.079 | fRNAdb |
| DrMe_M_smithRNA132r  | FR414006 | <i>Drosophila</i> | 0.079 | fRNAdb |
| DrMe_M_smithRNA132r  | FR414005 | <i>Drosophila</i> | 0.079 | fRNAdb |
| DrMe_M_smithRNA132r  | FR414004 | <i>Drosophila</i> | 0.079 | fRNAdb |
| DrMe_M_smithRNA132r  | FR414003 | <i>Drosophila</i> | 0.079 | fRNAdb |
| DrMe_M_smithRNA132r  | FR414002 | <i>Drosophila</i> | 0.079 | fRNAdb |
| DrMe_M_smithRNA132r  | FR412442 | <i>Drosophila</i> | 0.079 | fRNAdb |
| DrMe_M_smithRNA132r  | FR460818 | <i>Drosophila</i> | 0.31  | fRNAdb |
| DrMe_M_smithRNA132r  | FR458880 | <i>Drosophila</i> | 0.31  | fRNAdb |
| DrMe_M_smithRNA132r  | FR426664 | <i>Drosophila</i> | 0.31  | fRNAdb |
| DrMe_M_smithRNA132r  | FR426663 | <i>Drosophila</i> | 0.31  | fRNAdb |
| DrMe_M_smithRNA132r  | FR426662 | <i>Drosophila</i> | 0.31  | fRNAdb |
| DrMe_M_smithRNA132r  | FR426661 | <i>Drosophila</i> | 0.31  | fRNAdb |
| DrMe_M_smithRNA132r  | FR426660 | <i>Drosophila</i> | 0.31  | fRNAdb |
| DrMe_M_smithRNA132r  | FR426659 | <i>Drosophila</i> | 0.31  | fRNAdb |
| DrMe_M_smithRNA132r  | FR421700 | <i>Drosophila</i> | 0.31  | fRNAdb |
| DrMe_M_smithRNA132r  | FR412441 | <i>Drosophila</i> | 0.31  | fRNAdb |
| DrMe_M_smithRNA133rA | FR441631 | <i>Drosophila</i> | 4e-05 | fRNAdb |



|                      |          |                   |       |        |
|----------------------|----------|-------------------|-------|--------|
| DrMe_M_smithRNA133rA | FR463301 | <i>Drosophila</i> | 1e-04 | fRNAdb |
| DrMe_M_smithRNA133rA | FR463300 | <i>Drosophila</i> | 1e-04 | fRNAdb |
| DrMe_M_smithRNA133rA | FR463299 | <i>Drosophila</i> | 1e-04 | fRNAdb |
| DrMe_M_smithRNA133rA | FR463298 | <i>Drosophila</i> | 1e-04 | fRNAdb |
| DrMe_M_smithRNA133rA | FR463297 | <i>Drosophila</i> | 1e-04 | fRNAdb |
| DrMe_M_smithRNA133rA | FR463296 | <i>Drosophila</i> | 1e-04 | fRNAdb |
| DrMe_M_smithRNA133rA | FR422480 | <i>Drosophila</i> | 1e-04 | fRNAdb |
| DrMe_M_smithRNA133rA | FR476803 | <i>Drosophila</i> | 6e-04 | fRNAdb |
| DrMe_M_smithRNA133rA | FR476802 | <i>Drosophila</i> | 6e-04 | fRNAdb |
| DrMe_M_smithRNA133rA | FR476801 | <i>Drosophila</i> | 6e-04 | fRNAdb |
| DrMe_M_smithRNA133rA | FR463295 | <i>Drosophila</i> | 6e-04 | fRNAdb |
| DrMe_M_smithRNA133rA | FR422479 | <i>Drosophila</i> | 6e-04 | fRNAdb |
| DrMe_M_smithRNA133rA | FR490968 | <i>Drosophila</i> | 0.002 | fRNAdb |
| DrMe_M_smithRNA133rA | FR476800 | <i>Drosophila</i> | 0.002 | fRNAdb |
| DrMe_M_smithRNA133rA | FR463294 | <i>Drosophila</i> | 0.002 | fRNAdb |
| DrMe_M_smithRNA133rA | FR460466 | <i>Drosophila</i> | 0.002 | fRNAdb |
| DrMe_M_smithRNA133rA | FR430519 | <i>Drosophila</i> | 0.002 | fRNAdb |
| DrMe_M_smithRNA133rA | FR430518 | <i>Drosophila</i> | 0.002 | fRNAdb |
| DrMe_M_smithRNA133rA | FR430517 | <i>Drosophila</i> | 0.002 | fRNAdb |
| DrMe_M_smithRNA133rA | FR430516 | <i>Drosophila</i> | 0.002 | fRNAdb |
| DrMe_M_smithRNA133rA | FR430515 | <i>Drosophila</i> | 0.002 | fRNAdb |
| DrMe_M_smithRNA133rA | FR430514 | <i>Drosophila</i> | 0.002 | fRNAdb |
| DrMe_M_smithRNA133rA | FR430513 | <i>Drosophila</i> | 0.002 | fRNAdb |
| DrMe_M_smithRNA133rA | FR430512 | <i>Drosophila</i> | 0.002 | fRNAdb |
| DrMe_M_smithRNA133rA | FR427608 | <i>Drosophila</i> | 0.002 | fRNAdb |
| DrMe_M_smithRNA133rA | FR422478 | <i>Drosophila</i> | 0.002 | fRNAdb |
| DrMe_M_smithRNA133rA | FR508945 | <i>Drosophila</i> | 0.009 | fRNAdb |
| DrMe_M_smithRNA133rA | FR508944 | <i>Drosophila</i> | 0.009 | fRNAdb |
| DrMe_M_smithRNA133rA | FR508943 | <i>Drosophila</i> | 0.009 | fRNAdb |
| DrMe_M_smithRNA133rA | FR508942 | <i>Drosophila</i> | 0.009 | fRNAdb |
| DrMe_M_smithRNA133rA | FR508941 | <i>Drosophila</i> | 0.009 | fRNAdb |
| DrMe_M_smithRNA133rA | FR463293 | <i>Drosophila</i> | 0.009 | fRNAdb |
| DrMe_M_smithRNA133rA | FR460465 | <i>Drosophila</i> | 0.009 | fRNAdb |
| DrMe_M_smithRNA133rA | FR430511 | <i>Drosophila</i> | 0.009 | fRNAdb |
| DrMe_M_smithRNA133rA | FR506935 | <i>Drosophila</i> | 0.035 | fRNAdb |
| DrMe_M_smithRNA133rA | FR506934 | <i>Drosophila</i> | 0.035 | fRNAdb |
| DrMe_M_smithRNA133rA | FR506933 | <i>Drosophila</i> | 0.035 | fRNAdb |
| DrMe_M_smithRNA133rA | FR506932 | <i>Drosophila</i> | 0.035 | fRNAdb |
| DrMe_M_smithRNA133rA | FR506931 | <i>Drosophila</i> | 0.035 | fRNAdb |
| DrMe_M_smithRNA133rA | FR490967 | <i>Drosophila</i> | 0.035 | fRNAdb |
| DrMe_M_smithRNA133rA | FR460464 | <i>Drosophila</i> | 0.035 | fRNAdb |
| DrMe_M_smithRNA133rA | FR441630 | <i>Drosophila</i> | 0.035 | fRNAdb |

|                      |                 |                        |                    |       |         |
|----------------------|-----------------|------------------------|--------------------|-------|---------|
| DrMe_M_smithRNA133rA | FR438629        | <i>Drosophila</i>      |                    | 0.035 | fRNAdb  |
| DrMe_M_smithRNA133rA | FR427607        | <i>Drosophila</i>      |                    | 0.035 | fRNAdb  |
| DrMe_M_smithRNA133rA | FR414324        | <i>Drosophila</i>      |                    | 0.035 | fRNAdb  |
| DrMe_M_smithRNA133rA | FR501575        | <i>Drosophila</i>      |                    | 0.14  | fRNAdb  |
| DrMe_M_smithRNA133rA | FR501574        | <i>Drosophila</i>      |                    | 0.14  | fRNAdb  |
| DrMe_M_smithRNA133rA | FR501573        | <i>Drosophila</i>      |                    | 0.14  | fRNAdb  |
| DrMe_M_smithRNA133rA | FR501572        | <i>Drosophila</i>      |                    | 0.14  | fRNAdb  |
| DrMe_M_smithRNA133rA | FR490966        | <i>Drosophila</i>      |                    | 0.14  | fRNAdb  |
| DrMe_M_smithRNA133rA | FR441629        | <i>Drosophila</i>      |                    | 0.14  | fRNAdb  |
| DrMe_M_smithRNA133rA | FR438628        | <i>Drosophila</i>      |                    | 0.14  | fRNAdb  |
| DrMe_M_smithRNA133rB | piR-dme-1094845 | <i>D. melanogaster</i> | chrM:13370-13396:- |       | piRBase |
| DrMe_M_smithRNA133rB | FR481783        | <i>Drosophila</i>      |                    | 4e-06 | fRNAdb  |
| DrMe_M_smithRNA133rB | FR499875        | <i>Drosophila</i>      |                    | 1e-05 | fRNAdb  |
| DrMe_M_smithRNA133rB | FR441956        | <i>Drosophila</i>      |                    | 1e-05 | fRNAdb  |
| DrMe_M_smithRNA133rB | FR428980        | <i>Drosophila</i>      |                    | 1e-05 | fRNAdb  |
| DrMe_M_smithRNA133rB | FR499874        | <i>Drosophila</i>      |                    | 6e-05 | fRNAdb  |
| DrMe_M_smithRNA133rB | FR481782        | <i>Drosophila</i>      |                    | 6e-05 | fRNAdb  |
| DrMe_M_smithRNA133rB | FR476137        | <i>Drosophila</i>      |                    | 6e-05 | fRNAdb  |
| DrMe_M_smithRNA133rB | FR428979        | <i>Drosophila</i>      |                    | 6e-05 | fRNAdb  |
| DrMe_M_smithRNA133rB | FR499873        | <i>Drosophila</i>      |                    | 2e-04 | fRNAdb  |
| DrMe_M_smithRNA133rB | FR476136        | <i>Drosophila</i>      |                    | 2e-04 | fRNAdb  |
| DrMe_M_smithRNA133rB | FR441955        | <i>Drosophila</i>      |                    | 2e-04 | fRNAdb  |
| DrMe_M_smithRNA133rB | FR428978        | <i>Drosophila</i>      |                    | 2e-04 | fRNAdb  |
| DrMe_M_smithRNA133rB | FR481781        | <i>Drosophila</i>      |                    | 9e-04 | fRNAdb  |
| DrMe_M_smithRNA133rB | FR476135        | <i>Drosophila</i>      |                    | 9e-04 | fRNAdb  |
| DrMe_M_smithRNA133rB | FR428977        | <i>Drosophila</i>      |                    | 9e-04 | fRNAdb  |
| DrMe_M_smithRNA133rB | FR476134        | <i>Drosophila</i>      |                    | 0.004 | fRNAdb  |
| DrMe_M_smithRNA133rB | FR448500        | <i>Drosophila</i>      |                    | 0.004 | fRNAdb  |
| DrMe_M_smithRNA133rB | FR441954        | <i>Drosophila</i>      |                    | 0.004 | fRNAdb  |
| DrMe_M_smithRNA133rB | FR428976        | <i>Drosophila</i>      |                    | 0.004 | fRNAdb  |
| DrMe_M_smithRNA133rB | FR424963        | <i>Drosophila</i>      |                    | 0.004 | fRNAdb  |
| DrMe_M_smithRNA133rB | FR476133        | <i>Drosophila</i>      |                    | 0.014 | fRNAdb  |
| DrMe_M_smithRNA133rB | FR469959        | <i>Drosophila</i>      |                    | 0.014 | fRNAdb  |
| DrMe_M_smithRNA133rB | FR441953        | <i>Drosophila</i>      |                    | 0.014 | fRNAdb  |
| DrMe_M_smithRNA133rB | FR428975        | <i>Drosophila</i>      |                    | 0.014 | fRNAdb  |
| DrMe_M_smithRNA133rB | FR423893        | <i>Drosophila</i>      |                    | 0.014 | fRNAdb  |
| DrMe_M_smithRNA133rB | FR413549        | <i>Drosophila</i>      |                    | 0.014 | fRNAdb  |
| DrMe_M_smithRNA133rB | FR476132        | <i>Drosophila</i>      |                    | 0.055 | fRNAdb  |
| DrMe_M_smithRNA133rB | FR469958        | <i>Drosophila</i>      |                    | 0.055 | fRNAdb  |
| DrMe_M_smithRNA133rB | FR424962        | <i>Drosophila</i>      |                    | 0.055 | fRNAdb  |
| DrMe_M_smithRNA133rB | FR423892        | <i>Drosophila</i>      |                    | 0.055 | fRNAdb  |
| DrMe_M_smithRNA133rB | FR413548        | <i>Drosophila</i>      |                    | 0.055 | fRNAdb  |

|                      |                 |                        |                    |       |         |
|----------------------|-----------------|------------------------|--------------------|-------|---------|
| DrMe_M_smithRNA133rB | FR469957        | <i>Drosophila</i>      |                    | 0.22  | fRNAdb  |
| DrMe_M_smithRNA133rB | FR424961        | <i>Drosophila</i>      |                    | 0.22  | fRNAdb  |
| DrMe_M_smithRNA133rB | FR423891        | <i>Drosophila</i>      |                    | 0.22  | fRNAdb  |
| DrMe_M_smithRNA133rB | FR413547        | <i>Drosophila</i>      |                    | 0.22  | fRNAdb  |
| DrMe_M_smithRNA133rB | FR413216        | <i>Drosophila</i>      |                    | 0.22  | fRNAdb  |
| DrMe_M_smithRNA133rB | FR409498        | <i>Drosophila</i>      |                    | 0.22  | fRNAdb  |
| DrMe_M_smithRNA133rB | FR408261        | <i>Drosophila</i>      |                    | 0.22  | fRNAdb  |
| DrMe_M_smithRNA141r  | piR-dme-1955501 | <i>D. melanogaster</i> | chrM:14176-14205:- |       | piRBase |
| DrMe_M_smithRNA141r  | FR439019        | <i>Drosophila</i>      |                    | 2e-05 | fRNAdb  |
| DrMe_M_smithRNA141r  | FR481729        | <i>Drosophila</i>      |                    | 7e-05 | fRNAdb  |
| DrMe_M_smithRNA141r  | FR443572        | <i>Drosophila</i>      |                    | 7e-05 | fRNAdb  |
| DrMe_M_smithRNA141r  | FR481898        | <i>Drosophila</i>      |                    | 3e-04 | fRNAdb  |
| DrMe_M_smithRNA141r  | FR481728        | <i>Drosophila</i>      |                    | 3e-04 | fRNAdb  |
| DrMe_M_smithRNA141r  | FR463902        | <i>Drosophila</i>      |                    | 3e-04 | fRNAdb  |
| DrMe_M_smithRNA141r  | FR443571        | <i>Drosophila</i>      |                    | 3e-04 | fRNAdb  |
| DrMe_M_smithRNA141r  | FR442257        | <i>Drosophila</i>      |                    | 3e-04 | fRNAdb  |
| DrMe_M_smithRNA141r  | FR481897        | <i>Drosophila</i>      |                    | 0.001 | fRNAdb  |
| DrMe_M_smithRNA141r  | FR463901        | <i>Drosophila</i>      |                    | 0.001 | fRNAdb  |
| DrMe_M_smithRNA141r  | FR441808        | <i>Drosophila</i>      |                    | 0.001 | fRNAdb  |
| DrMe_M_smithRNA141r  | FR435815        | <i>Drosophila</i>      |                    | 0.001 | fRNAdb  |
| DrMe_M_smithRNA141r  | FR481896        | <i>Drosophila</i>      |                    | 0.004 | fRNAdb  |
| DrMe_M_smithRNA141r  | FR481727        | <i>Drosophila</i>      |                    | 0.004 | fRNAdb  |
| DrMe_M_smithRNA141r  | FR446541        | <i>Drosophila</i>      |                    | 0.004 | fRNAdb  |
| DrMe_M_smithRNA141r  | FR442256        | <i>Drosophila</i>      |                    | 0.004 | fRNAdb  |
| DrMe_M_smithRNA141r  | FR439018        | <i>Drosophila</i>      |                    | 0.004 | fRNAdb  |
| DrMe_M_smithRNA141r  | FR435814        | <i>Drosophila</i>      |                    | 0.004 | fRNAdb  |
| DrMe_M_smithRNA141r  | FR426006        | <i>Drosophila</i>      |                    | 0.004 | fRNAdb  |
| DrMe_M_smithRNA141r  | FR442255        | <i>Drosophila</i>      |                    | 0.018 | fRNAdb  |
| DrMe_M_smithRNA141r  | FR435813        | <i>Drosophila</i>      |                    | 0.018 | fRNAdb  |
| DrMe_M_smithRNA141r  | FR416077        | <i>Drosophila</i>      |                    | 0.018 | fRNAdb  |
| DrMe_M_smithRNA141r  | FR448784        | <i>Drosophila</i>      |                    | 0.070 | fRNAdb  |
| DrMe_M_smithRNA141r  | FR448783        | <i>Drosophila</i>      |                    | 0.070 | fRNAdb  |
| DrMe_M_smithRNA141r  | FR448782        | <i>Drosophila</i>      |                    | 0.070 | fRNAdb  |
| DrMe_M_smithRNA141r  | FR435812        | <i>Drosophila</i>      |                    | 0.070 | fRNAdb  |
| DrMe_M_smithRNA141r  | FR416076        | <i>Drosophila</i>      |                    | 0.070 | fRNAdb  |
| DrMe_M_smithRNA141r  | FR462625        | <i>Drosophila</i>      |                    | 0.27  | fRNAdb  |
| DrMe_M_smithRNA141r  | FR435811        | <i>Drosophila</i>      |                    | 0.27  | fRNAdb  |
| DrMe_M_smithRNA141r  | FR432800        | <i>Drosophila</i>      |                    | 0.27  | fRNAdb  |
| DrMe_M_smithRNA141r  | FR416075        | <i>Drosophila</i>      |                    | 0.27  | fRNAdb  |
| DrMe_M_smithRNA141r  | FR415496        | <i>Drosophila</i>      |                    | 0.27  | fRNAdb  |
| DrMe_M_smithRNA144r  | piR-dme-671956  | <i>D. melanogaster</i> | chrM:14396-14420:- |       | piRBase |
| DrMe_M_smithRNA144r  | FR471252        | <i>Drosophila</i>      |                    | 5e-05 | fRNAdb  |

|                      |                  |                     |                    |       |         |
|----------------------|------------------|---------------------|--------------------|-------|---------|
| DrMe_M_smithRNA144r  | FR424101         | <i>Drosophila</i>   |                    | 2e-04 | fRNAdb  |
| DrMe_M_smithRNA144r  | FR443602         | <i>Drosophila</i>   |                    | 7e-04 | fRNAdb  |
| DrMe_M_smithRNA144r  | FR443601         | <i>Drosophila</i>   |                    | 7e-04 | fRNAdb  |
| DrMe_M_smithRNA144r  | FR423402         | <i>Drosophila</i>   |                    | 7e-04 | fRNAdb  |
| DrMe_M_smithRNA144r  | FR464001         | <i>Drosophila</i>   |                    | 0.003 | fRNAdb  |
| DrMe_M_smithRNA144r  | FR443600         | <i>Drosophila</i>   |                    | 0.003 | fRNAdb  |
| DrMe_M_smithRNA144r  | FR424100         | <i>Drosophila</i>   |                    | 0.003 | fRNAdb  |
| DrMe_M_smithRNA144r  | FR416696         | <i>Drosophila</i>   |                    | 0.003 | fRNAdb  |
| DrMe_M_smithRNA144r  | FR505546         | <i>Drosophila</i>   |                    | 0.011 | fRNAdb  |
| DrMe_M_smithRNA144r  | FR497451         | <i>Drosophila</i>   |                    | 0.011 | fRNAdb  |
| DrMe_M_smithRNA144r  | FR478656         | <i>Drosophila</i>   |                    | 0.011 | fRNAdb  |
| DrMe_M_smithRNA144r  | FR424099         | <i>Drosophila</i>   |                    | 0.011 | fRNAdb  |
| DrMe_M_smithRNA144r  | FR423401         | <i>Drosophila</i>   |                    | 0.011 | fRNAdb  |
| DrMe_M_smithRNA144r  | FR505545         | <i>Drosophila</i>   |                    | 0.045 | fRNAdb  |
| DrMe_M_smithRNA144r  | FR497450         | <i>Drosophila</i>   |                    | 0.045 | fRNAdb  |
| DrMe_M_smithRNA144r  | FR474437         | <i>Drosophila</i>   |                    | 0.045 | fRNAdb  |
| DrMe_M_smithRNA144r  | FR467085         | <i>Drosophila</i>   |                    | 0.045 | fRNAdb  |
| DrMe_M_smithRNA144r  | FR424666         | <i>Drosophila</i>   |                    | 0.045 | fRNAdb  |
| DrMe_M_smithRNA144r  | FR423400         | <i>Drosophila</i>   |                    | 0.045 | fRNAdb  |
| DrMe_M_smithRNA144r  | FR497449         | <i>Drosophila</i>   |                    | 0.18  | fRNAdb  |
| DrMe_M_smithRNA144r  | FR467084         | <i>Drosophila</i>   |                    | 0.18  | fRNAdb  |
| DrMe_M_smithRNA144r  | FR425386         | <i>Drosophila</i>   |                    | 0.18  | fRNAdb  |
| MuMu_F_smithRNA11r   | piR-mmu-55370144 | <i>Mus musculus</i> | chrM:1093-1118:+   |       | piRBase |
| MuMu_F_smithRNA156nc | piR-mmu-4681867  | <i>Mus musculus</i> | chrM:15615-15642:- |       | piRBase |
| MuMu_F_smithRNA24r   | piR-mmu-51313768 | <i>Mus musculus</i> |                    |       | piRBase |
| MuMu_F_smithRNA37t   | piR-mmu-10841588 | <i>Mus musculus</i> |                    |       | piRBase |
| MuMu_F_smithRNA7r    | piR-mmu-31083152 | <i>Mus musculus</i> | chrM:779-809:+     |       | piRBase |
| MuMu_M_smithRNA8r    | piR-mmu-1076637  | <i>Mus musculus</i> | chrM:838-866:+     |       | piRBase |

<sup>1</sup> Name of retrieved piRNA/miRNA, or fRNAdb Accession.

<sup>2</sup> When available.

Supplementary Table S5. GenBank Accession Numbers of complete mitochondrial genomes of *Drosophila melanogaster* and *Mus musculus*.

| Species                        | GenBank Accession Number |
|--------------------------------|--------------------------|
| <i>Drosophila melanogaster</i> | AF200828                 |
|                                | CM008274                 |
|                                | CM010505                 |
|                                | CM010512                 |
|                                | CM010519                 |
|                                | CM010526                 |
|                                | CM010533                 |
|                                | CM010540                 |
|                                | CM010547                 |
|                                | CM010554                 |
|                                | CM010561                 |
|                                | CM010568                 |
|                                | CM010575                 |
|                                | CM010582                 |
|                                | CM010589                 |
|                                | CM010596                 |
|                                | DMU37541                 |
|                                | JQ686693                 |
|                                | JQ686694                 |
|                                | KJ947872                 |
|                                | KP161877                 |
|                                | KP843842                 |
|                                | KP843843                 |
|                                | KP843844                 |
|                                | KP843845                 |
|                                | KP843846                 |
|                                | KP843847                 |
|                                | KP843848                 |
|                                | KP843849                 |
|                                | KP843850                 |
|                                | KP843851                 |
|                                | KP843852                 |
|                                | KP843853                 |
|                                | KP843854                 |
|                                | KT174472                 |
|                                | KT174473                 |
|                                | KT174474                 |
|                                | KT896664                 |

*Mus musculus*

KU764535  
KY310613  
KY310614  
KY310615  
NC\_024511  
AY172335  
AY339599  
AY466499  
AY533105  
AY533106  
AY533107  
AY533108  
AY675564  
AY999076  
CM004178  
CM004179  
CM004180  
CM004181  
CM004182  
CM004183  
CM004184  
CM004185  
CM004186  
CM004187  
CM004189  
CM004214  
CM004255  
CM004276  
CM004277  
D83491  
DQ106412  
DQ106413  
DQ874614  
EF108330  
EF108331  
EF108332  
EF108333  
EF108334  
EF108335  
EF108336  
EF108337  
EF108338

EF108339  
EF108340  
EF108341  
EF108342  
EF108343  
EF108344  
EF108345  
EU312160  
EU312161  
EU315228  
EU315229  
EU450583  
FJ374639  
FJ374640  
FJ374641  
FJ374642  
FJ374643  
FJ374644  
FJ374645  
FJ374646  
FJ374647  
FJ374648  
FJ374649  
FJ374650  
FJ374651  
FJ374652  
FJ374653  
FJ374654  
FJ374655  
FJ374656  
FJ374657  
FJ374658  
FJ374659  
FJ374660  
FJ374661  
FJ374662  
FJ374663  
FJ374664  
FJ374665  
FJ803909  
GQ871744  
GQ871745

GQ871746  
HQ586004  
HQ675026  
HQ675027  
HQ675028  
HQ675029  
HQ675030  
HQ675031  
HQ877407  
J01420  
JF286601  
JQ003190  
JX945964  
JX945965  
JX945966  
JX945967  
JX945968  
JX945969  
JX945970  
JX945971  
JX945972  
JX945973  
JX945974  
JX945975  
JX945976  
JX945977  
JX945978  
JX945979  
KC663618  
KC663619  
KC663620  
KC663621  
KC663622  
KF781645  
KF781646  
KF781647  
KF781648  
KF781649  
KF781650  
KF781651  
KF781652  
KF781653



KF781654  
KF781655  
KF781656  
KF781657  
KF781658  
KF781659  
KF781660  
KF781661  
KF781662  
KF781663  
KF781664  
KF937873  
KF937874  
KF937875  
KF937876  
KP090294  
KP260514  
KP260515  
KP260516  
KP260517  
KP877610  
KP877611  
KP877612  
KP877613  
KP877614  
KP877615  
KP877616  
KP877617  
KP877618  
KP877619  
KP877620  
KR020497  
KR020498  
KR020499  
KR020500  
KY018919  
NC\_005089  
NC\_006914  
NC\_006915  
NC\_010339  
NC\_012387

---

Supplementary Table S6. PCR primers.

| Primer name     | Sequence                           | Reference  |
|-----------------|------------------------------------|------------|
| MLUR_3604       | 5'-AGTTTTCAAAGCTCTATATTTTGGGTTA-3' | [50]       |
| MLUR_4442       | 5'-TTTTAAACTTCATGGATTCATTACAA-3'   | [50]       |
| RuPhM_p1_156F   | 5'-GCTCCTACTAGTAATATTTCTTTT-3'     | This study |
| RuPhM_p1_1543R  | 5'-TTTTATGATTAACTACCAAACC-3'       | This study |
| RuPhM_p3_12612F | 5'-TTATGTTAAACGCAGATATAAGTA-3'     | This study |
| RuPhM_p3_13106R | 5'-AAAGAAAATTATTACCAATCCATG-3'     | This study |
| RuPhM_p4_14438F | 5'-GATAGGATTTGAAGATAAACGTT-3'      | This study |
| RuPhM_p4_14943R | 5'-AAAATAACAATAACCCTAACCTAA-3'     | This study |
| RuPhF_p1_169F   | 5'-GTCTTCCTATTTAATTTAGTGTTG-3'     | This study |
| RuPhF_p1_1526R  | 5'-TTCTTTATTAACTACCAAACAC-3'       | This study |
| RuPhF_p3_1285F  | 5'-TGAAATGAGGTCTTCTAATAAG-3'       | This study |
| RuPhF_p3_1921R  | 5'-CTTTAAACCTAAGCCATTAAATA-3'      | This study |

Supplementary Table S7. SRA Accession Numbers of raw reads used in this study.

| Dataset                                                                             | SRA Accession Number |
|-------------------------------------------------------------------------------------|----------------------|
| Ovary Replicate 1 sRNAseq; <i>Danio rerio</i> ; miRNA-Seq                           | SRR1265755           |
| Ovary Replicate 1 sRNAseq; <i>Danio rerio</i> ; miRNA-Seq                           | SRR1265756           |
| Ovary Replicate 1 sRNAseq; <i>Danio rerio</i> ; miRNA-Seq                           | SRR1265757           |
| Testis Replicate 1 sRNAseq; <i>Danio rerio</i> ; miRNA-Seq                          | SRR1265758           |
| Testis Replicate 1 sRNAseq; <i>Danio rerio</i> ; miRNA-Seq                          | SRR1265759           |
| Testis Replicate 1 sRNAseq; <i>Danio rerio</i> ; miRNA-Seq                          | SRR1265760           |
| ovary_rep1; <i>Danio rerio</i> ; RNA-Seq                                            | SRR6841457           |
| ovary_rep1; <i>Danio rerio</i> ; RNA-Seq                                            | SRR6841458           |
| ovary_rep1; <i>Danio rerio</i> ; RNA-Seq                                            | SRR6841459           |
| ovary_rep2; <i>Danio rerio</i> ; RNA-Seq                                            | SRR6841460           |
| ovary_rep2; <i>Danio rerio</i> ; RNA-Seq                                            | SRR6841461           |
| ovary_rep2; <i>Danio rerio</i> ; RNA-Seq                                            | SRR6841462           |
| testis_rep1; <i>Danio rerio</i> ; RNA-Seq                                           | SRR6841469           |
| testis_rep1; <i>Danio rerio</i> ; RNA-Seq                                           | SRR6841470           |
| testis_rep1; <i>Danio rerio</i> ; RNA-Seq                                           | SRR6841471           |
| testis_rep2; <i>Danio rerio</i> ; RNA-Seq                                           | SRR6841472           |
| testis_rep2; <i>Danio rerio</i> ; RNA-Seq                                           | SRR6841473           |
| testis_rep2; <i>Danio rerio</i> ; RNA-Seq                                           | SRR6841474           |
| smallRNA X^X (control) ovary Replica 1; <i>Drosophila melanogaster</i> ; ncRNA-Seq  | SRR5181429           |
| smallRNA X^X (control) ovary Replica 2; <i>Drosophila melanogaster</i> ; ncRNA-Seq  | SRR5181430           |
| smallRNA X^Y (control) testis Replica 1; <i>Drosophila melanogaster</i> ; ncRNA-Seq | SRR5181435           |
| smallRNA X^Y (control) testis Replica 2; <i>Drosophila melanogaster</i> ; ncRNA-Seq | SRR5181436           |
| mRNA X^X (control) ovary Replica 1; <i>Drosophila melanogaster</i> ; RNA-Seq        | SRR5181417           |
| mRNA X^X (control) ovary Replica 2; <i>Drosophila melanogaster</i> ; RNA-Seq        | SRR5181418           |
| mRNA X^Y (control) testis Replica 1; <i>Drosophila melanogaster</i> ; RNA-Seq       | SRR5181423           |
| mRNA X^Y (control) testis Replica 2; <i>Drosophila melanogaster</i> ; RNA-Seq       | SRR5181424           |
| Illumina HiSeq 1500 sequencing of SAMD00048521                                      | DRR083999            |
| Illumina HiSeq 1500 sequencing of SAMD00048521                                      | DRR084000            |
| Illumina HiSeq 1500 sequencing of SAMD00048521                                      | DRR084001            |
| Illumina HiSeq 1500 sequencing of SAMD00048521                                      | DRR084005            |
| Illumina HiSeq 1500 sequencing of SAMD00048521                                      | DRR084006            |
| Illumina HiSeq 1500 sequencing of SAMD00048521                                      | DRR084007            |
| Illumina HiSeq 1500 paired end sequencing of SAMD00048521                           | DRR084021            |
| Illumina HiSeq 1500 paired end sequencing of SAMD00048521                           | DRR084022            |
| Illumina HiSeq 1500 paired end sequencing of SAMD00048521                           | DRR084024            |
| Illumina HiSeq 1500 paired end sequencing of SAMD00048521                           | DRR084031            |
| Illumina HiSeq 1500 sequencing of SAMD00048521                                      | DRR084032            |
| Illumina HiSeq 1500 sequencing of SAMD00048521                                      | DRR084033            |
| P14_Con_s1; <i>Mus musculus</i> ; ncRNA-Seq                                         | SRR3521024           |

P14\_Con\_s2; *Mus musculus*; ncRNA-Seq

SRR3521025

P14\_Con\_1; *Mus musculus*; RNA-Seq

SRR3520994

P14\_Con\_2; *Mus musculus*; RNA-Seq

SRR3520995

---
